# Supplementary material
Source: Springer Nature journal article supplement (https://www.springermedizin.de/resource/supplementary/13075_2008_2475_MOESM7_ESM.pdf/9692170)
Supplement: MOESM7 [file 9692170]

| Variable                                             | Corticosteroid vs. no Corticosteroid Therapy |               |                | Immunosuppressive vs. no Immunosuppressive Therapy |               |                |
|------------------------------------------------------|----------------------------------------------|---------------|----------------|----------------------------------------------------|---------------|----------------|
|                                                      | <i>Odds ratio</i>                            | <i>95% CI</i> | <i>p-value</i> | <i>Odds ratio</i>                                  | <i>95% CI</i> | <i>p-value</i> |
| <b>Subspecialties (Rheumatology vs. Dermatology)</b> | 1.54                                         | 1.19 - 1.98   | 0.001          | 2.46                                               | 1.88 - 3.21   | < 0.0001       |
| <b>Gender (female vs. male)</b>                      | 0.69                                         | 0.51 - 0.96   | 0.025          | 0.78                                               | 0.56 - 1.10   | 0.13           |
| <b>Age (years)</b>                                   | 0.99                                         | 0.99 - 1.01   | 0.67           | 0.99                                               | 0.98 - 1.00   | 0.04           |
|                                                      | <b><i>SSc subsets</i></b>                    |               |                | <b><i>SSc subsets</i></b>                          |               |                |
| <b>lcSSc (reference group)</b>                       | 1.00                                         |               |                | 1.00                                               |               |                |
| <b>dcSSc</b>                                         | 1.47                                         | 0.45 - 4.88   | 0.53           | 1.77                                               | 0.51 - 6.19   | 0.37           |
| <b>Overlap syndrome</b>                              | 3.64                                         | 1.06 - 12.51  | 0.04           | 3.69                                               | 1.02 - 13.37  | 0.05           |
|                                                      | <b><i>Organ involvement</i></b>              |               |                | <b><i>Organ involvement</i></b>                    |               |                |
| <b>Pulmonary hypertension</b>                        | 0.83                                         | 0.59 - 1.17   | 0.30           | 0.94                                               | 0.66 - 1.35   | 0.73           |
| <b>Pulmonary fibrosis</b>                            | 2.30                                         | 1.77 - 2.99   | < 0.0001       | 1.53                                               | 1.16 - 2.00   | 0.002          |
| <b>Musculoskeletal system</b>                        | 1.40                                         | 1.08 - 1.81   | 0.01           | 1.31                                               | 1.00 - 1.71   | 0.05           |
| <b>Oesophagus</b>                                    | 1.01                                         | 0.78 - 1.29   | 0.96           | 0.92                                               | 0.70 - 1.20   | 0.53           |
| <b>Kidney</b>                                        | 1.66                                         | 1.12 - 2.47   | 0.01           | 0.91                                               | 0.59 - 1.38   | 0.64           |
| <b>Heart</b>                                         | 1.28                                         | 0.91 - 1.81   | 0.16           | 1.34                                               | 0.93 - 1.92   | 0.12           |

**Table 4:** Multivariate relationship of corticosteroid and immunosuppressive agent use with subspecialty, disease subset and organ involvement
